# Supplementary material
Source: PubMed Central journal article supplement (PMC10199464)

## Supplementary Material

### **Alpha7 Nicotinic Acetylcholine Receptor Mediates Chronic Nicotine Inhalation-Induced Cardiopulmonary Dysfunction**

Anna K. Whitehead<sup>1†</sup>, Nicholas D. Fried<sup>1†</sup>, Zhen Li<sup>2,3</sup>, Kandasamy Neelamegam<sup>1</sup>,  
Charlotte S. Pearson<sup>2</sup>, Kyle B. LaPenna<sup>2,3</sup>, Thomas E. Sharp<sup>3,4</sup>, David J. Lefer<sup>2,3</sup>, Eric  
Lazartigues<sup>2,3,5\*</sup>, Jason D. Gardner<sup>1\*</sup> and Xinping Yue<sup>1\*</sup>

<sup>1</sup>Department of Physiology, <sup>2</sup>Department of Pharmacology & Experimental Therapeutics,  
<sup>3</sup>Cardiovascular Center of Excellence, and <sup>4</sup>Department of Medicine Section of Cardiology,  
Louisiana State University Health Sciences Center, New Orleans, LA 70112, USA; <sup>5</sup>Southeast  
Louisiana Veterans Health Care Systems, New Orleans, LA 70119, USA

†These authors contributed equally to this work.

**Running title:** Nicotine Impairs Cardiopulmonary Function via  $\alpha 7$ -nAChR

**\*Corresponding authors:**

Xinping Yue, MD, PhD; 504-568-2024; xyue@lsuhsc.edu; Department of Physiology  
Jason D. Gardner, PhD; 504-568-7252; jgardn@lsuhsc.edu; Department of Physiology  
and Eric Lazartigues, PhD; 504-568-3210; elazar@lsuhsc.edu; Department of Pharmacology  
Louisiana State University Health Sciences Center, New Orleans, LA 70112

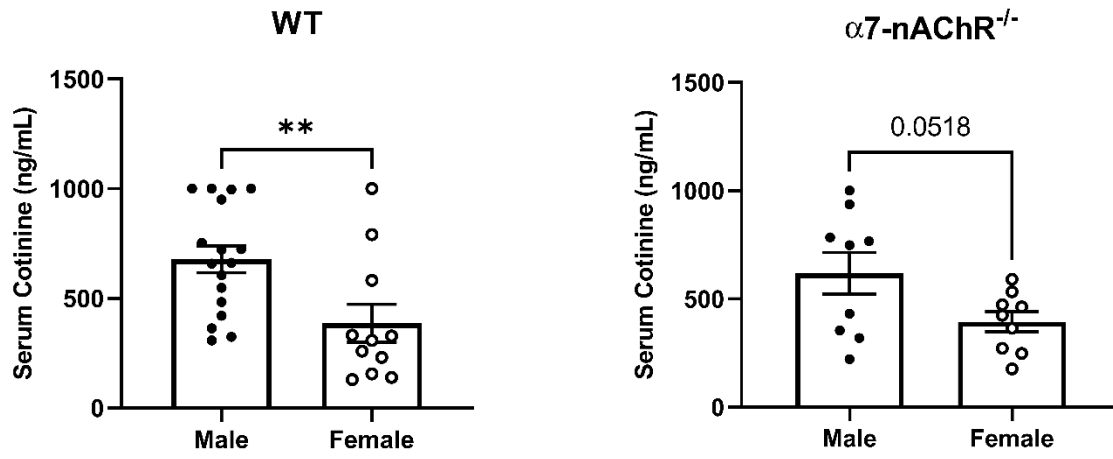

Figure S1. Serum cotinine levels in wildtype (WT) and  $\alpha 7$ -nAChR<sup>-/-</sup> male and female mice exposed to nicotine. \*\* $P < 0.01$ .

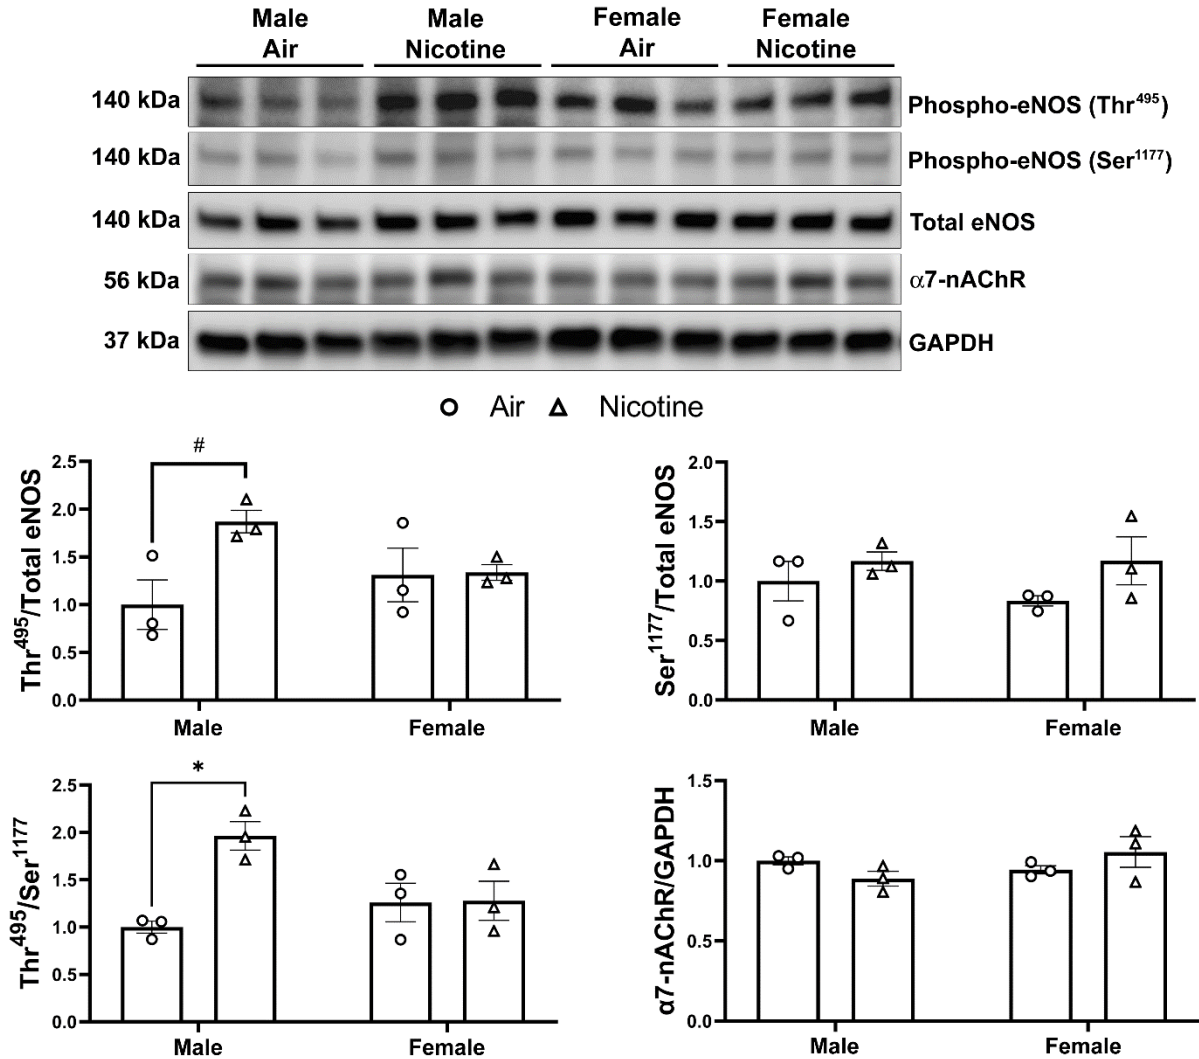

**Figure S2. Comparison of the expression levels of total and phosphorylated eNOS and  $\alpha$ 7-nAChR between wildtype male and female mice.** Western blot (top) analysis and quantification (bottom) of phospho-eNOS at Thr<sup>495</sup>, phospho-eNOS at Ser<sup>1177</sup>, total eNOS, and  $\alpha$ 7-nAChR in right ventricular samples collected from wildtype male and female mice exposed to air (control) or nicotine. \* $P < 0.05$ , analyzed via two-way ANOVA followed by Tukey-Kramer post hoc test; # $P < 0.05$ , analyzed by two-tail student t-test.

**Table S1.** List of genes differentially regulated by nicotine in wildtype male mice.

| Gene Symbol   | baseMean   | log2FoldChange<br>(Nicotine/Air) | lfcSE    | stat     | pvalue   | padj     |
|---------------|------------|----------------------------------|----------|----------|----------|----------|
| A530064D06Rik | 5.76296126 | 6.004438512                      | 1.732198 | 3.466369 | 0.000528 | 0.059887 |
| RP24-492L15.6 | 9.80919374 | 4.274460383                      | 1.153528 | 3.705554 | 0.000211 | 0.034104 |
| Osm           | 9.9095008  | 3.821824764                      | 1.067233 | 3.581059 | 0.000342 | 0.043745 |
| Il6           | 12.5566953 | 3.546360484                      | 1.042764 | 3.400923 | 0.000672 | 0.070456 |
| Tnni2         | 9.56593576 | 3.45123752                       | 0.945807 | 3.648989 | 0.000263 | 0.038883 |
| Cxcl2         | 11.1563266 | 3.413310992                      | 1.024859 | 3.330518 | 0.000867 | 0.08399  |
| Nts           | 11.7619339 | 3.240390059                      | 0.963486 | 3.363193 | 0.00077  | 0.076603 |
| Slfn4         | 20.3558712 | 2.967855148                      | 0.876093 | 3.387601 | 0.000705 | 0.071983 |
| Egr2          | 317.523646 | 2.955708364                      | 0.734759 | 4.022689 | 5.75E-05 | 0.015355 |
| Ccl2          | 45.9930875 | 2.917982694                      | 0.491438 | 5.937647 | 2.89E-09 | 6.28E-06 |
| Apold1        | 116.25715  | 2.713269372                      | 0.443162 | 6.122517 | 9.21E-10 | 2.34E-06 |
| Fam167a       | 28.5980128 | 2.670813881                      | 0.541548 | 4.931814 | 8.15E-07 | 0.000729 |
| Il1b          | 40.6789558 | 2.381712448                      | 0.685852 | 3.472635 | 0.000515 | 0.059393 |
| Cyp2e1        | 1617.0202  | 2.35649886                       | 0.6607   | 3.566668 | 0.000362 | 0.045832 |
| Hdc           | 65.2569392 | 2.356310055                      | 0.425854 | 5.533138 | 3.15E-08 | 4.63E-05 |
| Atp2a1        | 23.8572923 | 2.305482378                      | 0.678913 | 3.395844 | 0.000684 | 0.0708   |
| Wnt2          | 24.4838303 | 2.284339239                      | 0.558194 | 4.092376 | 4.27E-05 | 0.013598 |
| Has2          | 19.0942902 | 2.265987376                      | 0.693814 | 3.265988 | 0.001091 | 0.097407 |
| Cish          | 64.9100246 | 2.245235242                      | 0.548854 | 4.090769 | 4.30E-05 | 0.013598 |
| Cxcr4         | 54.9127116 | 2.242303374                      | 0.594188 | 3.773729 | 0.000161 | 0.029476 |
| Cd83          | 84.7729648 | 2.205374247                      | 0.482248 | 4.573108 | 4.81E-06 | 0.002809 |
| Dnajb1        | 1192.66633 | 2.168507813                      | 0.622074 | 3.485933 | 0.00049  | 0.057387 |
| Agtr1a        | 21.4514253 | 2.163944126                      | 0.591686 | 3.657251 | 0.000255 | 0.038397 |
| Mfsd2a        | 30.4369303 | 2.154943034                      | 0.547799 | 3.93382  | 8.36E-05 | 0.018703 |
| Has1          | 61.4700354 | 2.104107112                      | 0.339576 | 6.196285 | 5.78E-10 | 1.76E-06 |
| Stil          | 20.2571145 | 2.084634977                      | 0.575736 | 3.62082  | 0.000294 | 0.040246 |
| Errfi1        | 2821.12901 | 2.053837504                      | 0.259721 | 7.907851 | 2.62E-15 | 3.98E-11 |
| Cxcl1         | 49.3168934 | 2.014029749                      | 0.422219 | 4.770111 | 1.84E-06 | 0.001489 |
| Sele          | 44.2154416 | 2.013736319                      | 0.508109 | 3.963195 | 7.40E-05 | 0.01744  |
| Adam8         | 47.381225  | 1.935010785                      | 0.539808 | 3.584629 | 0.000338 | 0.043516 |
| Prox1         | 49.4659636 | 1.832934833                      | 0.504807 | 3.630965 | 0.000282 | 0.039771 |
| Kenk5         | 27.7555063 | 1.814825536                      | 0.459653 | 3.94825  | 7.87E-05 | 0.017968 |
| Ces1f         | 165.525113 | 1.807972495                      | 0.485411 | 3.724623 | 0.000196 | 0.032343 |
| Nfil3         | 333.033316 | 1.772005143                      | 0.405265 | 4.372465 | 1.23E-05 | 0.005663 |
| Anxa8         | 46.5609926 | 1.747417512                      | 0.418284 | 4.17759  | 2.95E-05 | 0.010826 |
| Muc16         | 42.8020191 | 1.743639759                      | 0.471865 | 3.695207 | 0.00022  | 0.034104 |
| Clca3a1       | 39.8907997 | 1.735929126                      | 0.479271 | 3.62202  | 0.000292 | 0.040246 |
| Phlda1        | 76.4316836 | 1.702338627                      | 0.358564 | 4.747651 | 2.06E-06 | 0.001489 |

|          |            |             |          |          |          |          |
|----------|------------|-------------|----------|----------|----------|----------|
| BB365896 | 83.2195771 | 1.698339056 | 0.451151 | 3.764457 | 0.000167 | 0.030227 |
| Cd33     | 90.2795556 | 1.57400593  | 0.373185 | 4.21776  | 2.47E-05 | 0.009877 |
| Ifi205   | 57.1065287 | 1.565576602 | 0.364488 | 4.295277 | 1.74E-05 | 0.007728 |
| Slc27a1  | 888.804302 | 1.532311802 | 0.3363   | 4.556378 | 5.20E-06 | 0.002809 |
| Tlr7     | 51.3305973 | 1.518790783 | 0.381094 | 3.985343 | 6.74E-05 | 0.017373 |
| Ifi204   | 145.054865 | 1.483009491 | 0.330704 | 4.484403 | 7.31E-06 | 0.003588 |
| Orm1     | 157.75427  | 1.471068178 | 0.452211 | 3.253058 | 0.001142 | 0.099538 |
| Bcl3     | 82.4183086 | 1.45313997  | 0.356345 | 4.077897 | 4.54E-05 | 0.013667 |
| Dusp4    | 211.872408 | 1.451048801 | 0.445418 | 3.257726 | 0.001123 | 0.099328 |
| Chst1    | 104.663367 | 1.423975947 | 0.333866 | 4.265118 | 2.00E-05 | 0.008443 |
| Tst      | 103.244989 | 1.422624316 | 0.373084 | 3.813149 | 0.000137 | 0.02688  |
| Ms4a6b   | 72.8145655 | 1.418047656 | 0.371403 | 3.818083 | 0.000134 | 0.02688  |
| Fam46a   | 1816.44078 | 1.408582969 | 0.2531   | 5.565315 | 2.62E-08 | 4.42E-05 |
| Col6a5   | 34.1269983 | 1.391682554 | 0.428834 | 3.245273 | 0.001173 | 0.099718 |
| Myh14    | 122.072687 | 1.380239868 | 0.355735 | 3.879967 | 0.000104 | 0.022694 |
| Junb     | 1608.01598 | 1.340012175 | 0.36682  | 3.653056 | 0.000259 | 0.038647 |
| Hmcn1    | 71.3860712 | 1.324116381 | 0.368511 | 3.593153 | 0.000327 | 0.043516 |
| Ptgs2    | 663.801704 | 1.319221859 | 0.348554 | 3.784846 | 0.000154 | 0.028533 |
| Ccl6     | 371.797185 | 1.311083986 | 0.317725 | 4.126472 | 3.68E-05 | 0.012679 |
| Cilp     | 123.434481 | 1.290829656 | 0.337516 | 3.824498 | 0.000131 | 0.02688  |
| Slc1a3   | 697.571205 | 1.28217463  | 0.28164  | 4.55253  | 5.30E-06 | 0.002809 |
| Tnfaip6  | 100.265352 | 1.281860143 | 0.306602 | 4.180856 | 2.90E-05 | 0.010826 |
| Rcan1    | 572.705447 | 1.281484115 | 0.200638 | 6.387034 | 1.69E-10 | 6.43E-07 |
| Csrnp1   | 451.325688 | 1.279006562 | 0.320444 | 3.991358 | 6.57E-05 | 0.01723  |
| Dnajb4   | 5305.51016 | 1.271424576 | 0.254789 | 4.990114 | 6.03E-07 | 0.000574 |
| Islr2    | 67.7542813 | 1.270406951 | 0.358134 | 3.547291 | 0.000389 | 0.048136 |
| Abra     | 246.760911 | 1.264229413 | 0.31415  | 4.024285 | 5.71E-05 | 0.015355 |
| Serpine1 | 12059.8748 | 1.261370124 | 0.265634 | 4.748523 | 2.05E-06 | 0.001489 |
| Sfrp4    | 1702.88766 | 1.242208158 | 0.242228 | 5.128268 | 2.92E-07 | 0.000318 |
| Slfn2    | 113.831469 | 1.237949394 | 0.334802 | 3.697557 | 0.000218 | 0.034104 |
| Csf2rb   | 81.6844797 | 1.237437857 | 0.35098  | 3.525664 | 0.000422 | 0.051407 |
| Fosl2    | 3036.05577 | 1.231775769 | 0.167622 | 7.348542 | 2.00E-13 | 1.52E-09 |
| Me1      | 2750.00905 | 1.230791182 | 0.328959 | 3.741475 | 0.000183 | 0.030922 |
| Gpm6a    | 74.4527924 | 1.213030604 | 0.358836 | 3.380459 | 0.000724 | 0.073388 |
| Atp1a3   | 97.4472947 | 1.210625875 | 0.368635 | 3.284074 | 0.001023 | 0.094331 |
| AI607873 | 253.372834 | 1.210601402 | 0.266044 | 4.550386 | 5.35E-06 | 0.002809 |
| Cebpb    | 813.410013 | 1.20331283  | 0.259114 | 4.643944 | 3.42E-06 | 0.002225 |
| Gem      | 1043.85278 | 1.194893336 | 0.258077 | 4.629981 | 3.66E-06 | 0.002225 |
| Plk3     | 111.331538 | 1.188637135 | 0.365893 | 3.248596 | 0.00116  | 0.099538 |
| Nr4a3    | 1955.85709 | 1.176486329 | 0.313018 | 3.758524 | 0.000171 | 0.030588 |
| Car5b    | 413.987584 | 1.158155803 | 0.339188 | 3.414494 | 0.000639 | 0.067976 |

|         |            |             |          |          |          |          |
|---------|------------|-------------|----------|----------|----------|----------|
| Nrros   | 119.239154 | 1.152098787 | 0.354778 | 3.247383 | 0.001165 | 0.099538 |
| Hmox1   | 161.046342 | 1.148083166 | 0.296157 | 3.876606 | 0.000106 | 0.022694 |
| Siah2   | 140.152024 | 1.145709716 | 0.308544 | 3.713281 | 0.000205 | 0.033465 |
| Mrc1    | 839.688537 | 1.13781156  | 0.206049 | 5.522037 | 3.35E-08 | 4.63E-05 |
| Arid5a  | 939.923819 | 1.131669087 | 0.216409 | 5.229319 | 1.70E-07 | 0.000216 |
| Slc5a6  | 152.523192 | 1.12880637  | 0.263059 | 4.291069 | 1.78E-05 | 0.007728 |
| Fcgr3   | 150.032907 | 1.12050863  | 0.263259 | 4.256299 | 2.08E-05 | 0.008545 |
| Bmp2    | 313.712387 | 1.119195278 | 0.29113  | 3.844318 | 0.000121 | 0.025541 |
| St3gal6 | 201.643178 | 1.117394141 | 0.273439 | 4.086453 | 4.38E-05 | 0.013598 |
| Ccl9    | 186.263536 | 1.113387822 | 0.289943 | 3.840029 | 0.000123 | 0.025635 |
| Sik1    | 1445.45424 | 1.111258886 | 0.305726 | 3.634821 | 0.000278 | 0.039677 |
| Irs2    | 2668.41392 | 1.108285173 | 0.26885  | 4.122317 | 3.75E-05 | 0.012679 |
| Itgam   | 223.040416 | 1.089097351 | 0.294505 | 3.698061 | 0.000217 | 0.034104 |
| Myc     | 150.818804 | 1.072474507 | 0.298575 | 3.591977 | 0.000328 | 0.043516 |
| Mafb    | 440.514532 | 1.07039959  | 0.207647 | 5.154901 | 2.54E-07 | 0.000297 |
| Aacs    | 1022.26773 | 1.069105538 | 0.268625 | 3.979916 | 6.89E-05 | 0.01744  |
| Spry4   | 361.708468 | 1.062283503 | 0.222882 | 4.766116 | 1.88E-06 | 0.001489 |
| Cadm3   | 175.318706 | 1.05929495  | 0.29245  | 3.622136 | 0.000292 | 0.040246 |
| Lbp     | 218.154585 | 1.059247477 | 0.278429 | 3.804372 | 0.000142 | 0.027033 |
| Klf16   | 147.225809 | 1.047564955 | 0.27473  | 3.813074 | 0.000137 | 0.02688  |
| Bag3    | 2661.08016 | 0.995843566 | 0.273182 | 3.645345 | 0.000267 | 0.039059 |
| Trib1   | 608.593366 | 0.995490776 | 0.245912 | 4.048155 | 5.16E-05 | 0.014817 |
| Ccdc117 | 536.468254 | 0.994921455 | 0.246307 | 4.039363 | 5.36E-05 | 0.015098 |
| Igfbp6  | 994.652238 | 0.987577372 | 0.151667 | 6.511466 | 7.44E-11 | 3.77E-07 |
| Fam107b | 248.565821 | 0.966160021 | 0.273993 | 3.526222 | 0.000422 | 0.051407 |
| H2-Ab1  | 674.04376  | 0.959954208 | 0.261591 | 3.66968  | 0.000243 | 0.036943 |
| Ssc5d   | 165.063833 | 0.954510341 | 0.235582 | 4.051715 | 5.08E-05 | 0.014817 |
| Spry2   | 374.008774 | 0.951033964 | 0.240951 | 3.946999 | 7.91E-05 | 0.017968 |
| Bhlhe40 | 1329.24748 | 0.930414932 | 0.165952 | 5.606532 | 2.06E-08 | 3.93E-05 |
| Gpt2    | 252.160926 | 0.920878152 | 0.266983 | 3.449199 | 0.000562 | 0.062336 |
| Gfpt2   | 1093.90096 | 0.916158229 | 0.219476 | 4.174292 | 2.99E-05 | 0.010826 |
| C4b     | 1981.13885 | 0.914790444 | 0.263157 | 3.47621  | 0.000509 | 0.059054 |
| Csflr   | 700.87136  | 0.904507136 | 0.195309 | 4.63115  | 3.64E-06 | 0.002225 |
| H2-Aa   | 475.417734 | 0.900281939 | 0.259551 | 3.468609 | 0.000523 | 0.059837 |
| Thbs1   | 3753.03171 | 0.885902312 | 0.249058 | 3.557014 | 0.000375 | 0.047156 |
| Ugdh    | 590.22487  | 0.88153662  | 0.175033 | 5.036412 | 4.74E-07 | 0.000481 |
| Lyve1   | 428.925393 | 0.877108413 | 0.196525 | 4.463085 | 8.08E-06 | 0.00384  |
| Jmjd6   | 304.402126 | 0.870374183 | 0.242763 | 3.585286 | 0.000337 | 0.043516 |
| Klf4    | 1381.4757  | 0.854138104 | 0.205096 | 4.16457  | 3.12E-05 | 0.011035 |
| Dcun1d3 | 567.460179 | 0.849291818 | 0.236448 | 3.591869 | 0.000328 | 0.043516 |
| Wsb1    | 415.354397 | 0.797913741 | 0.245138 | 3.254958 | 0.001134 | 0.099538 |

|               |            |              |          |          |          |          |
|---------------|------------|--------------|----------|----------|----------|----------|
| C1qc          | 410.534969 | 0.785105819  | 0.2294   | 3.422435 | 0.000621 | 0.066958 |
| Litaf         | 468.161669 | 0.783514951  | 0.191501 | 4.091449 | 4.29E-05 | 0.013598 |
| Hes1          | 333.782893 | 0.779077555  | 0.208033 | 3.744976 | 0.00018  | 0.030922 |
| F13a1         | 1096.48633 | 0.769722411  | 0.184024 | 4.182723 | 2.88E-05 | 0.010826 |
| C1qb          | 317.651237 | 0.758872247  | 0.20634  | 3.677775 | 0.000235 | 0.036152 |
| Lyz2          | 1584.0642  | 0.754983496  | 0.190579 | 3.961522 | 7.45E-05 | 0.01744  |
| Tsc22d3       | 1100.55696 | 0.750742336  | 0.186274 | 4.030311 | 5.57E-05 | 0.015355 |
| Cyth1         | 518.573724 | 0.740493865  | 0.22674  | 3.265826 | 0.001091 | 0.097407 |
| Ctgf          | 34005.1436 | 0.739708579  | 0.190433 | 3.884348 | 0.000103 | 0.022621 |
| Mxd1          | 415.521786 | 0.734036717  | 0.209378 | 3.505795 | 0.000455 | 0.053684 |
| Dusp16        | 609.89697  | 0.727313596  | 0.216985 | 3.351902 | 0.000803 | 0.078767 |
| Fndc1         | 1504.396   | 0.687140646  | 0.200582 | 3.42573  | 0.000613 | 0.066623 |
| Arid5b        | 3488.2493  | 0.682799282  | 0.144096 | 4.738508 | 2.15E-06 | 0.001489 |
| Pxdc1         | 515.944832 | 0.667049131  | 0.201046 | 3.317887 | 0.000907 | 0.085698 |
| Akap12        | 2490.03709 | 0.641718374  | 0.186392 | 3.442852 | 0.000576 | 0.062995 |
| Dusp8         | 758.263365 | 0.636571307  | 0.194362 | 3.275191 | 0.001056 | 0.096499 |
| Rgs2          | 887.721363 | 0.635336032  | 0.178916 | 3.55104  | 0.000384 | 0.047845 |
| Rnf2          | 364.699582 | 0.634035596  | 0.174319 | 3.637225 | 0.000276 | 0.039677 |
| Cttnbp2nl     | 1540.79827 | 0.626496965  | 0.138692 | 4.517187 | 6.27E-06 | 0.003178 |
| Jdp2          | 325.243326 | 0.624363267  | 0.187423 | 3.331308 | 0.000864 | 0.08399  |
| Dlc1          | 4144.8743  | 0.622750778  | 0.165954 | 3.752549 | 0.000175 | 0.030922 |
| Bach1         | 664.514551 | 0.607329064  | 0.159364 | 3.810952 | 0.000138 | 0.02688  |
| Slfn5         | 896.680684 | 0.589909226  | 0.177491 | 3.323599 | 0.000889 | 0.085312 |
| Efemp1        | 575.50149  | 0.582072466  | 0.168141 | 3.461819 | 0.000537 | 0.060013 |
| Lima1         | 1427.58058 | 0.543149063  | 0.145325 | 3.737483 | 0.000186 | 0.031071 |
| C3            | 9721.07529 | 0.540421026  | 0.159069 | 3.397408 | 0.00068  | 0.0708   |
| Slc3a2        | 853.414207 | 0.526041378  | 0.159469 | 3.29871  | 0.000971 | 0.090647 |
| Col14a1       | 6800.17094 | 0.509533008  | 0.156859 | 3.248358 | 0.001161 | 0.099538 |
| Chd1          | 1751.54605 | 0.484613689  | 0.135066 | 3.587983 | 0.000333 | 0.043516 |
| Zfp386        | 260.112351 | -0.684238712 | 0.205932 | -3.32264 | 0.000892 | 0.085312 |
| A430105I19Rik | 834.655224 | -0.751476721 | 0.230097 | -3.26591 | 0.001091 | 0.097407 |
| Zfp626        | 193.46282  | -0.774543099 | 0.204046 | -3.79592 | 0.000147 | 0.027625 |
| Jph2          | 4219.18174 | -0.82358423  | 0.244457 | -3.36904 | 0.000754 | 0.075989 |
| Kcnq3         | 161.578406 | -0.864021776 | 0.245791 | -3.51528 | 0.000439 | 0.052286 |
| Gm13111       | 306.888393 | -0.890926779 | 0.238022 | -3.74305 | 0.000182 | 0.030922 |
| Pde4a         | 510.718963 | -0.902443723 | 0.268203 | -3.36478 | 0.000766 | 0.076603 |
| Zfp810        | 153.251604 | -0.910038086 | 0.246138 | -3.69727 | 0.000218 | 0.034104 |
| Ky            | 121.71229  | -0.917030879 | 0.280072 | -3.27426 | 0.001059 | 0.096499 |
| Grip2         | 705.73336  | -0.933506156 | 0.229026 | -4.07599 | 4.58E-05 | 0.013667 |
| 9530077C05Rik | 102.970663 | -0.942186797 | 0.268057 | -3.51488 | 0.00044  | 0.052286 |
| Sel1l3        | 279.160274 | -0.944641612 | 0.237767 | -3.97298 | 7.10E-05 | 0.01744  |

|               |            |              |          |          |          |          |
|---------------|------------|--------------|----------|----------|----------|----------|
| Rasl10b       | 396.889177 | -0.970467176 | 0.289206 | -3.35562 | 0.000792 | 0.078219 |
| Fam84a        | 233.108615 | -0.979485968 | 0.282808 | -3.46343 | 0.000533 | 0.060013 |
| Zfp39         | 111.109767 | -0.981729683 | 0.289681 | -3.389   | 0.000701 | 0.071983 |
| Cav3          | 105.028962 | -0.981892852 | 0.300741 | -3.26492 | 0.001095 | 0.097407 |
| Mir143hg      | 660.703481 | -0.98476378  | 0.258544 | -3.80889 | 0.00014  | 0.02688  |
| Fbxl22        | 659.882444 | -0.987645267 | 0.275096 | -3.59018 | 0.00033  | 0.043516 |
| Bves          | 110.049191 | -1.018373687 | 0.299236 | -3.40324 | 0.000666 | 0.070346 |
| Bmf           | 108.356416 | -1.024591207 | 0.299841 | -3.41712 | 0.000633 | 0.067798 |
| Slc8a3        | 92.3263819 | -1.139692886 | 0.32414  | -3.51606 | 0.000438 | 0.052286 |
| Fam212b       | 297.134851 | -1.148406807 | 0.289763 | -3.96326 | 7.39E-05 | 0.01744  |
| Zfp41         | 57.4621181 | -1.193084369 | 0.359877 | -3.31526 | 0.000916 | 0.085975 |
| 4930522L14Rik | 56.5169899 | -1.215037279 | 0.334354 | -3.63398 | 0.000279 | 0.039677 |
| Zfp273        | 63.0959205 | -1.314562621 | 0.350778 | -3.74756 | 0.000179 | 0.030922 |
| Smim5         | 127.090327 | -1.535022113 | 0.445238 | -3.44764 | 0.000566 | 0.062336 |
| Nkx3-1        | 34.4951129 | -1.659295212 | 0.418869 | -3.96137 | 7.45E-05 | 0.01744  |
| Rab17         | 20.5341665 | -1.787771308 | 0.550073 | -3.25006 | 0.001154 | 0.099538 |
| Ifitm10       | 22.0248459 | -1.807132025 | 0.549337 | -3.28966 | 0.001003 | 0.093042 |
| Gm10451       | 10.715006  | -2.584308547 | 0.778404 | -3.32001 | 0.0009   | 0.085582 |



**Table S2.** List of genes differentially regulated by nicotine in  $\alpha 7$ -nAChR knockout male mice.

| <b>Gene Symbol</b> | <b>baseMean</b> | <b>log2FoldChange (Nicotine/Air)</b> | <b>lfcSE</b> | <b>stat</b> | <b>pvalue</b> | <b>padj</b> |
|--------------------|-----------------|--------------------------------------|--------------|-------------|---------------|-------------|
| Gpx3               | 4154.5886       | 1.37678613                           | 0.309004     | 4.455558    | 8.37E-06      | 0.025371    |
| Gmpr               | 248.99189       | 1.212432919                          | 0.272859     | 4.443447    | 8.85E-06      | 0.025371    |
| Zbtb16             | 1832.0117       | 0.815583834                          | 0.155112     | 5.25804     | 1.46E-07      | 0.001252    |
| Adamts1            | 3603.1786       | 0.62740568                           | 0.143309     | 4.377984    | 1.20E-05      | 0.029424    |
| Gm13889            | 638.55829       | -0.751783997                         | 0.165682     | -4.5375     | 5.69E-06      | 0.025371    |
| Adprh11            | 29.913821       | -2.570242834                         | 0.572401     | -4.49028    | 7.11E-06      | 0.025371    |
| Jchain             | 53.829692       | -2.616767358                         | 0.385938     | -6.78028    | 1.20E-11      | 2.06E-07    |

**Table S3.** RNA-seq data of up- and down-regulated pathways by nicotine in wildtype male mice.

| Upregulated Pathways by Nicotine                                             | Differentially Regulated Genes                                         | p-value        | Z-Score        |
|------------------------------------------------------------------------------|------------------------------------------------------------------------|----------------|----------------|
| Acute phase response signaling                                               | C3, C4b, Cebpb, Hmox1, Il6, Il1b, Lbp, Osm, Serpine1                   | 4.91E-06       | 2.646          |
| Complement system                                                            | C3, C1qb, C1qc, C4b, Itgam                                             | 5.71E-06       | 2.000          |
| Role of pattern recognition receptors in recognition of bacteria and viruses | C3, C1qb, C1qc, Il6, Il1b, Osm, Tlr7                                   | 1.08E-04       | 2.449          |
| TREM1 signaling                                                              | Cd83, Cxcl2, Il6, Il1b, Tlr7                                           | 1.83E-04       | 2.236          |
| Neuroinflammation signaling pathway                                          | Csf1r, H2-Aa, H2-Ab1, Hmox1, Il6, Il1b, Ptgs2, Slc1a3, Tlr7            | 2.65E-04       | 2.121          |
| Cardiac hypertrophy signaling (enhanced)                                     | Agtr1a, Atp2a1, Csf2rb, Il6, Il1b, Myc, Osm, Pde4a, Ptgs2, Rcan1, Wnt2 | 6.54E-04       | 2.714          |
| Dendritic cell maturation                                                    | Cd83, Fcgr3, H2-Aa, H2-Ab1, Il6, Il1b                                  | 1.85E-03       | 2.449          |
| IL6 signaling                                                                | Cebpb, Il6, Il1b, Lbp, Tnfaip6                                         | 1.88E-03       | 2.000          |
| Coronavirus pathogenesis pathway                                             | Agtr1a, Il6, Il1b, Ptgs2, Serpine1                                     | 4.12E-03       | 2.236          |
| HMGB1 signaling                                                              | Il6, Il1b, Osm, Sele, Serpine1                                         | 6.14E-03       | 2.000          |
| Th1 Pathway                                                                  | H2-Aa, H2-Ab1, Il6, Nfil3                                              | 1.05E-02       | 2.000          |
| ILK signaling                                                                | Bmp2, Irs2, Myc, Myh14, Ptgs2                                          | 1.10E-02       | 2.000          |
| Systemic lupus erythematosus in B cell signaling pathway                     | Fcgr3, Il1b, Il6, Myc, Osm, Tlr7                                       | 1.29E-02       | 1.633          |
| STAT3 pathway                                                                | Cish, Csf2rb, Il1b, Myc                                                | 1.51E-02       | 1.000          |
| Hepatic fibrosis signaling pathway                                           | Agtr1a, Cebpb, Il1b, Irs2, Myc, Serpine1, Wnt2                         | 1.51E-02       | 2.646          |
| Osteoarthritis pathway                                                       | Bmp2, Cebpb, Hes1, Il1b, Ptgs2                                         | 1.66E-02       | 2.236          |
| Colorectal cancer metastasis signaling                                       | Il6, Myc, Ptgs2, Tlr7, Wnt2                                            | 3.31E-02       | 2.236          |
| Role of NFAT in regulation of the immune response                            | Fcgr3, H2-Aa, H2-Ab1, Rcan1                                            | 3.89E-02       | 1.000          |
| <b>Downregulated Pathways by Nicotine</b>                                    | <b>Differentially Regulated Genes</b>                                  | <b>p-value</b> | <b>Z-Score</b> |
| LXR/RXR activation                                                           | C3, C4b, Il6, Il1b, Lbp, Lyz2, Ptgs2                                   | 2.32E-05       | -1.134         |
| cAMP-mediated signaling                                                      | Agtr1a, Akap12, Dusp4, Pde4a, Rgs2                                     | 2.23E-02       | -1.000         |
| Protein kinase A signaling                                                   | Akap12, Dusp4, Dusp8, Dusp16, Pde4a, Ptgs2, Tnni2                      | 2.24E-02       | -1.342         |

### Supplementary Material Original Western Blots

**Methods:** Equal amounts of proteins were run on 4-15% Tris-Glycine (TGX) gels (Bio-Rad # 4561086) with EZ-Run Pre-Stained Protein Ladder (Fisher BioReagents #BP3603-500), and positive bands were detected using ECL Prime Western Blotting Detection Reagent (Amersham #RPN2232). Some blots were cut into two pieces after transfer to probe for targets of different molecular weights.

**[ ]** Bands shown in Figure 5A (wildtype males: 1<sup>st</sup> 7 bands, air; 2<sup>nd</sup> 7 bands, nicotine)

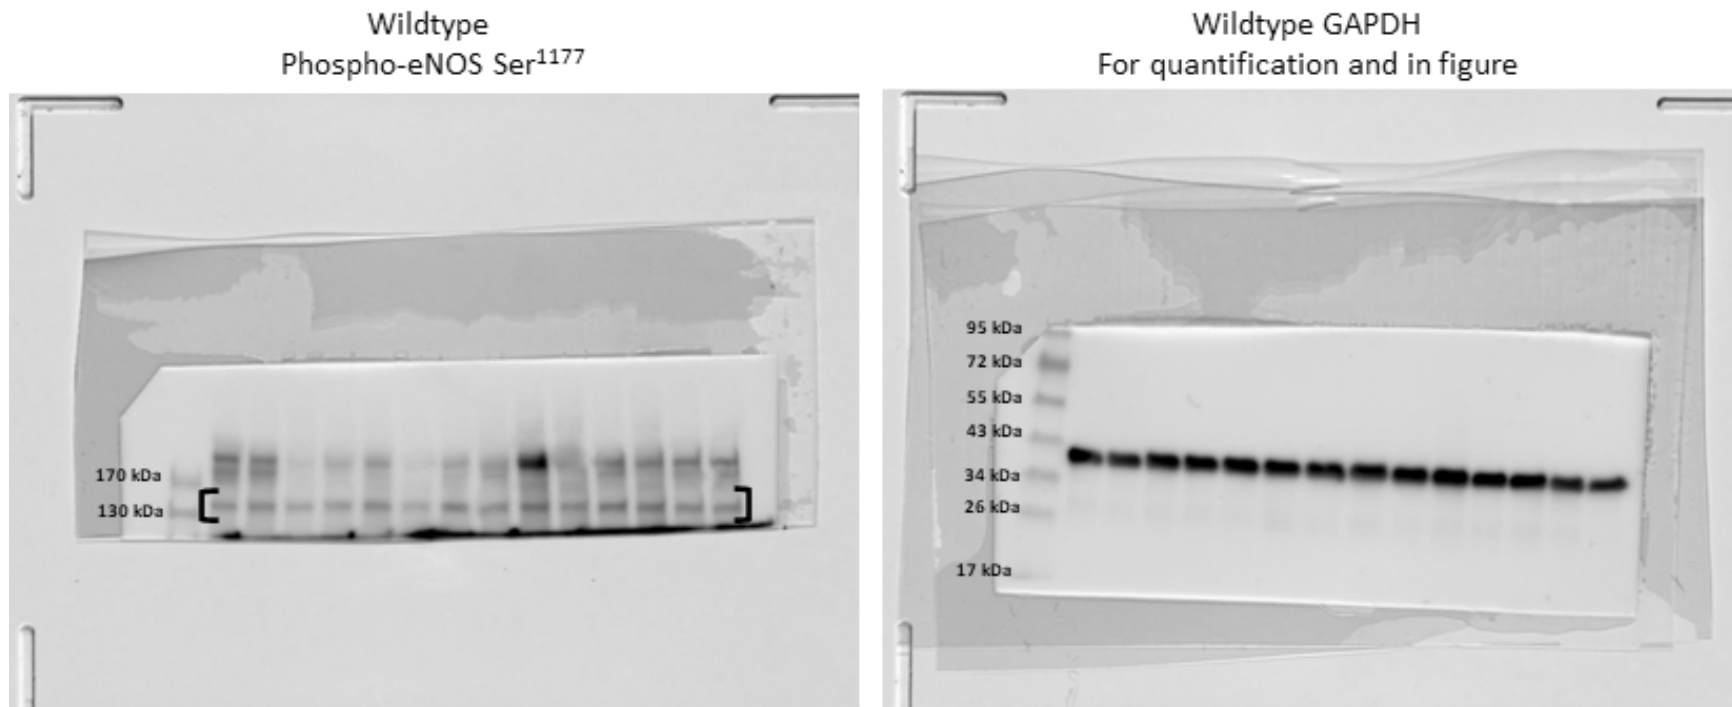

[ ] Bands shown in Figure 5A (wildtype males: 1<sup>st</sup> 7 bands, air; 2<sup>nd</sup> 7 bands, nicotine)

Wildtype  
Phospho-eNOS Thr<sup>495</sup>

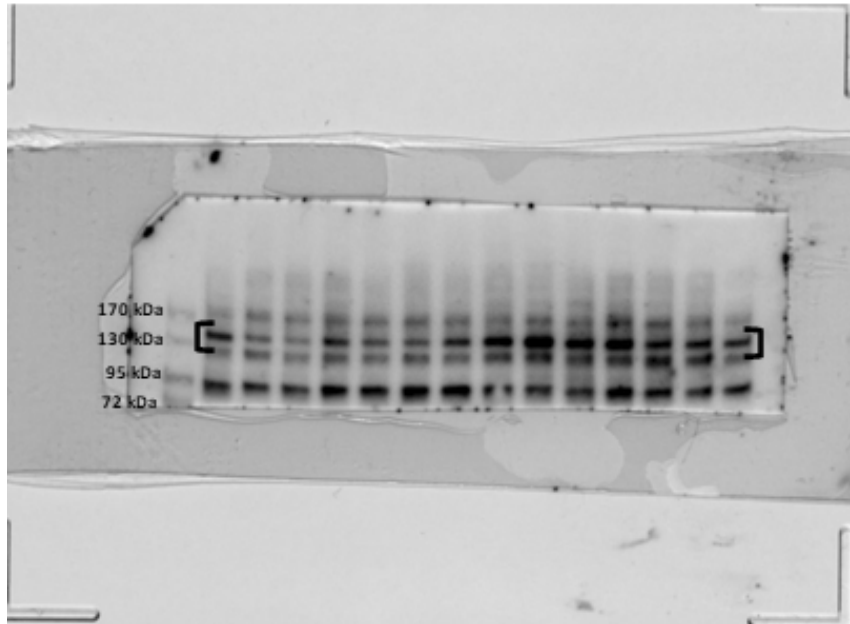

Wildtype GAPDH  
Used for quantification

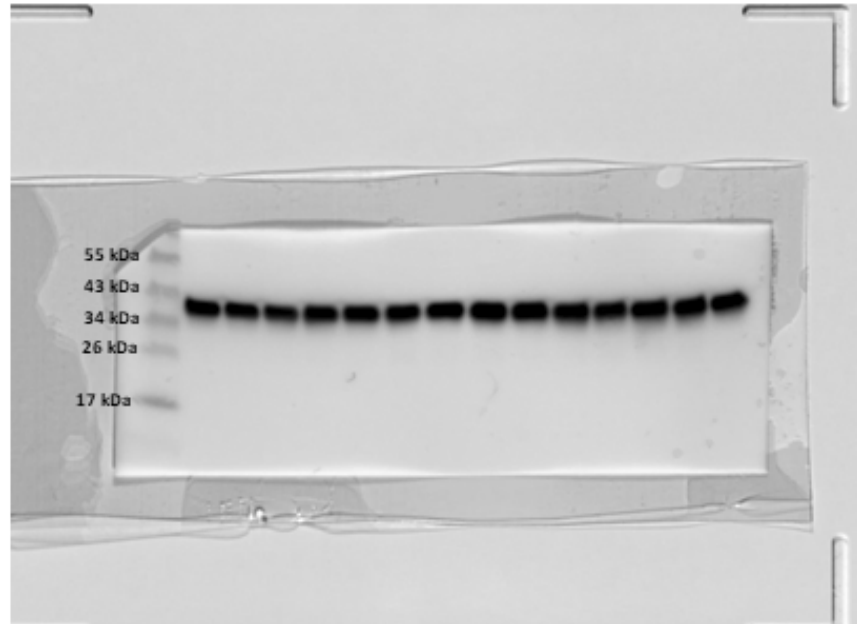

[ ] Bands shown in Figure 5A (wildtype males: 1<sup>st</sup> 7 bands, air; 2<sup>nd</sup> 7 bands, nicotine)

Wildtype  
Total eNOS on stripped blot from  
Phospho-eNOS Ser<sup>1177</sup>  
Used in quantification

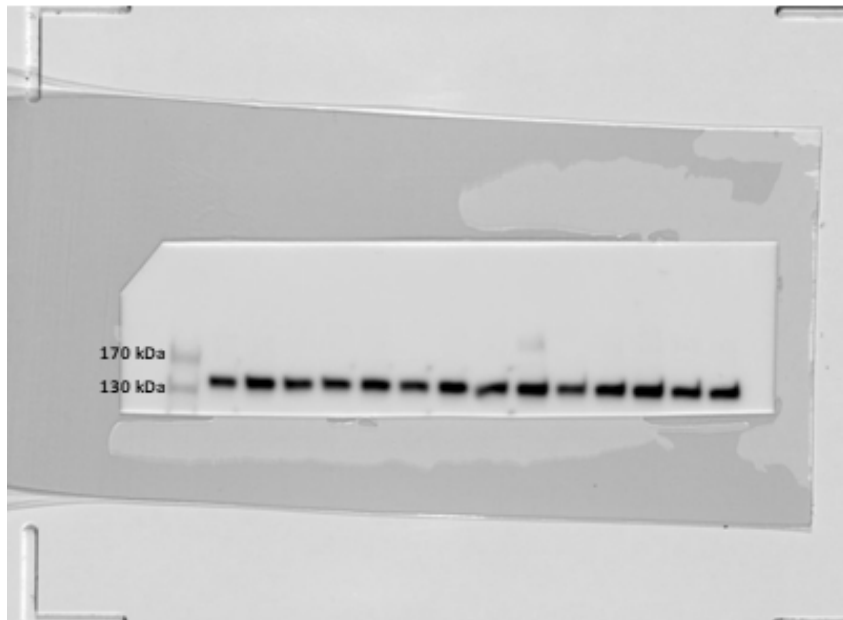

Wildtype  
Total eNOS on stripped blot from  
Phospho-eNOS Thr<sup>495</sup>  
Used in quantification and figure

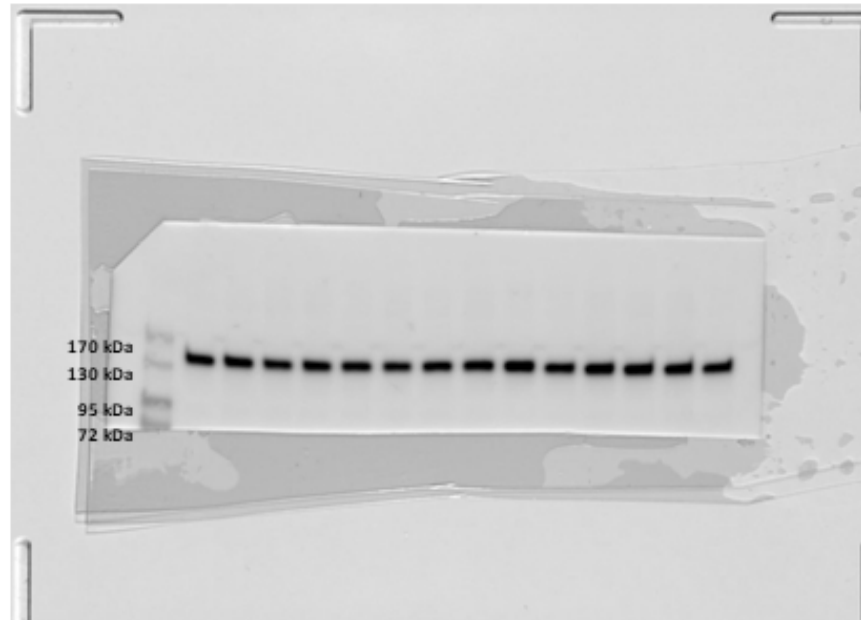

**[ ]** Bands shown in Figure 5B ( $\alpha 7$ -nAChR<sup>-/-</sup> males: 1<sup>st</sup> 6 bands, air; 2<sup>nd</sup> 6 bands, nicotine)

$\alpha 7$ -nAChR<sup>-/-</sup>  
Phospho-eNOS Ser<sup>1177</sup>

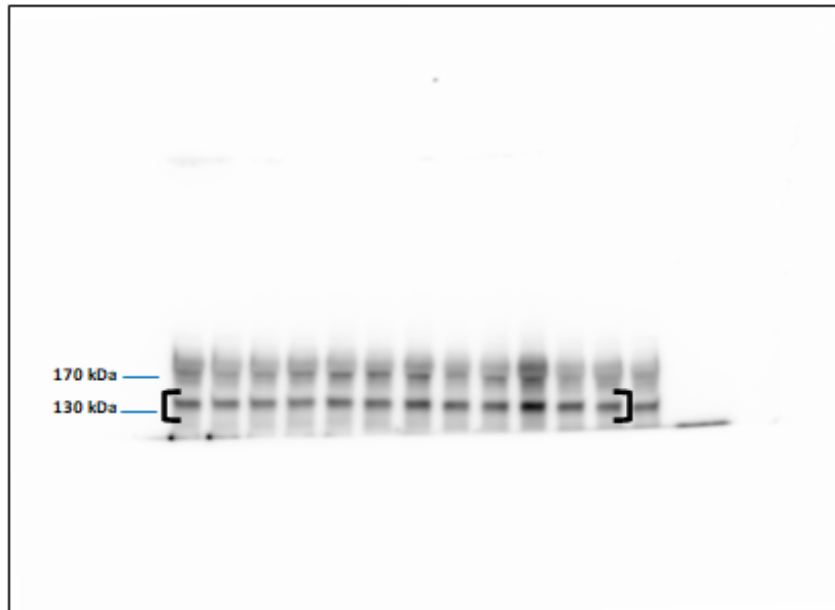

$\alpha 7$ -nAChR<sup>-/-</sup>  
Phospho-eNOS Thr<sup>495</sup>

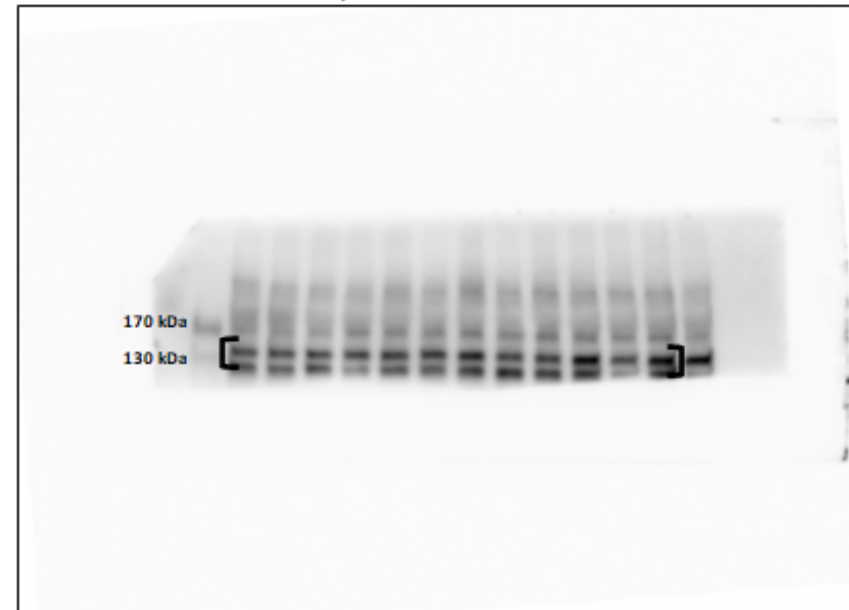

[ ] Bands shown in Figure 5B ( $\alpha 7$ -nAChR<sup>-/-</sup> males: 1<sup>st</sup> 6 bands, air; 2<sup>nd</sup> 6 bands, nicotine)

$\alpha 7$ -nAChR<sup>-/-</sup> Total eNOS  
Used for quantification of both Phospho-eNOS Thr<sup>495</sup> and Ser<sup>1177</sup> and in figure

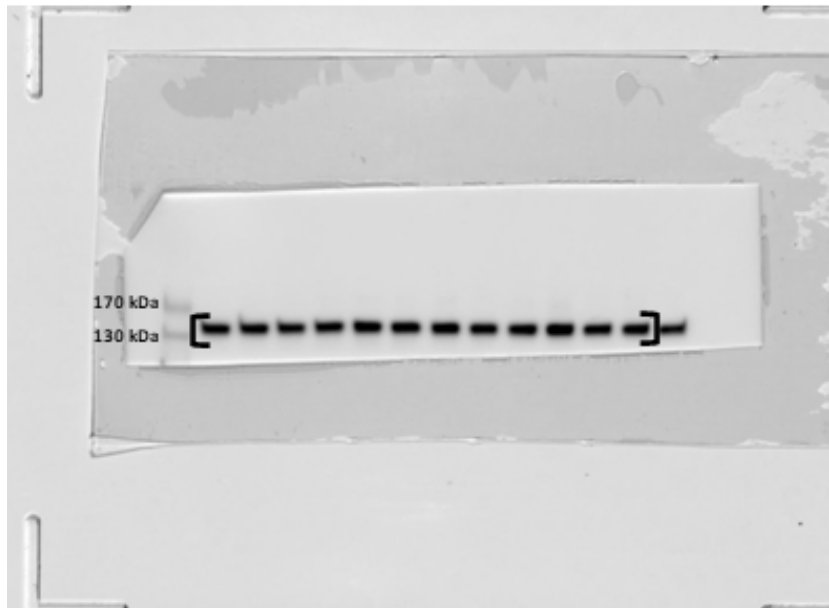

$\alpha 7$ -nAChR<sup>-/-</sup> GAPDH  
Used for quantification of both Phospho-eNOS Thr<sup>495</sup> and Ser<sup>1177</sup> and used in figure

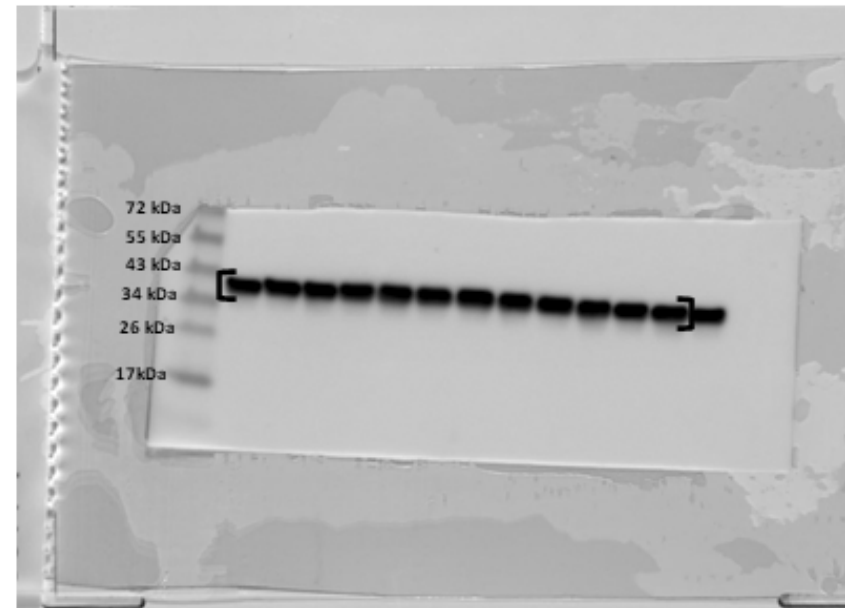

Supplement: NIHMS1897822-supplement-Supp.pdf [file NIHMS1897822-supplement-Supp.pdf]
